# Supplementary material for: Coevolutionary analyses require phylogenetically deep alignments and better null models to accurately detect inter-protein contacts within and between species
Source: BMC Bioinformatics. 2015 Aug 25;16:268. doi: 10.1186/s12859-015-0677-y (PMC4549020; doi:10.1186/s12859-015-0677-y)
Supplement: Additional file 5 — Accessions for Vif-A3G analysis. (CSV 0.73 kb) [file 12859_2015_677_MOESM5_ESM.csv]

Mammal	A3G_accession	Lentivirus	Vif_accession
Homo sapiens	NP_068594.1	HIV1	Q72499
Homo sapiens	NP_068594.1	HIV2	Q74121
Pan troglodytes	NP_001009001.1	SIVcpz	Q1A266
Gorilla gorilla	AAT44394.1	SIVgor	ACM63194.1
Macaca mulatta	NP_001185622.1	SIVmac	P05903
Macaca nestrina	ADU03765.1	SIVmne	AAA91932.1
Chlorocebus pygerythrus	AEY75955.1	SIVver	P27983
Chlorocebus tantalus	AEY75957.1	SIVtan	P89905
Chlorocebus sabaeus	AEY75959.1	SIVsab	AAA21506.1
Chlorocebus aethiops aethiops	AEY75961.1	SIVgri	AAA47589.1
Cercopithecus cephus	AGE34488.1	SIVmus1	ABO61046.1
Cercopithecus cephus	AGE34488.1	SIVmus2	ABO61055.1
Cercocebus torquatus	AGE34491.1	SIVrcm	AAK69675.1
Cercocebus atys	AGE34496.1	SIVsmm	P19506
Colobus guereza	AGE34499.1	SIVcol	AAK01034.1
